# Supplementary material for: Improving postpartum care delivery and uptake by implementing context-specific interventions in four countries in Africa: a realist evaluation of the Missed Opportunities in Maternal and Infant Health (MOMI) project
Source: PubMed Central journal article supplement — BMJ Glob Health. 2017 Nov 25;2(4):e000408. doi: 10.1136/bmjgh-2017-000408 (PMC5717926; doi:10.1136/bmjgh-2017-000408), 2017-11-25

## Appendix 1. Programme theories represented by Context (C) – Mechanism (M) – Outcome (O) Configurations

These configurations were theorised based on the first wave of data collection and tested with the data collected in the second wave of data collection.

Mechanisms are broken down into Resources and Reasoning<sup>28</sup>. Arrows indicate how a set of CMO is hypothesised to impact the context of another set of CMO.

### Programme theories: In the community

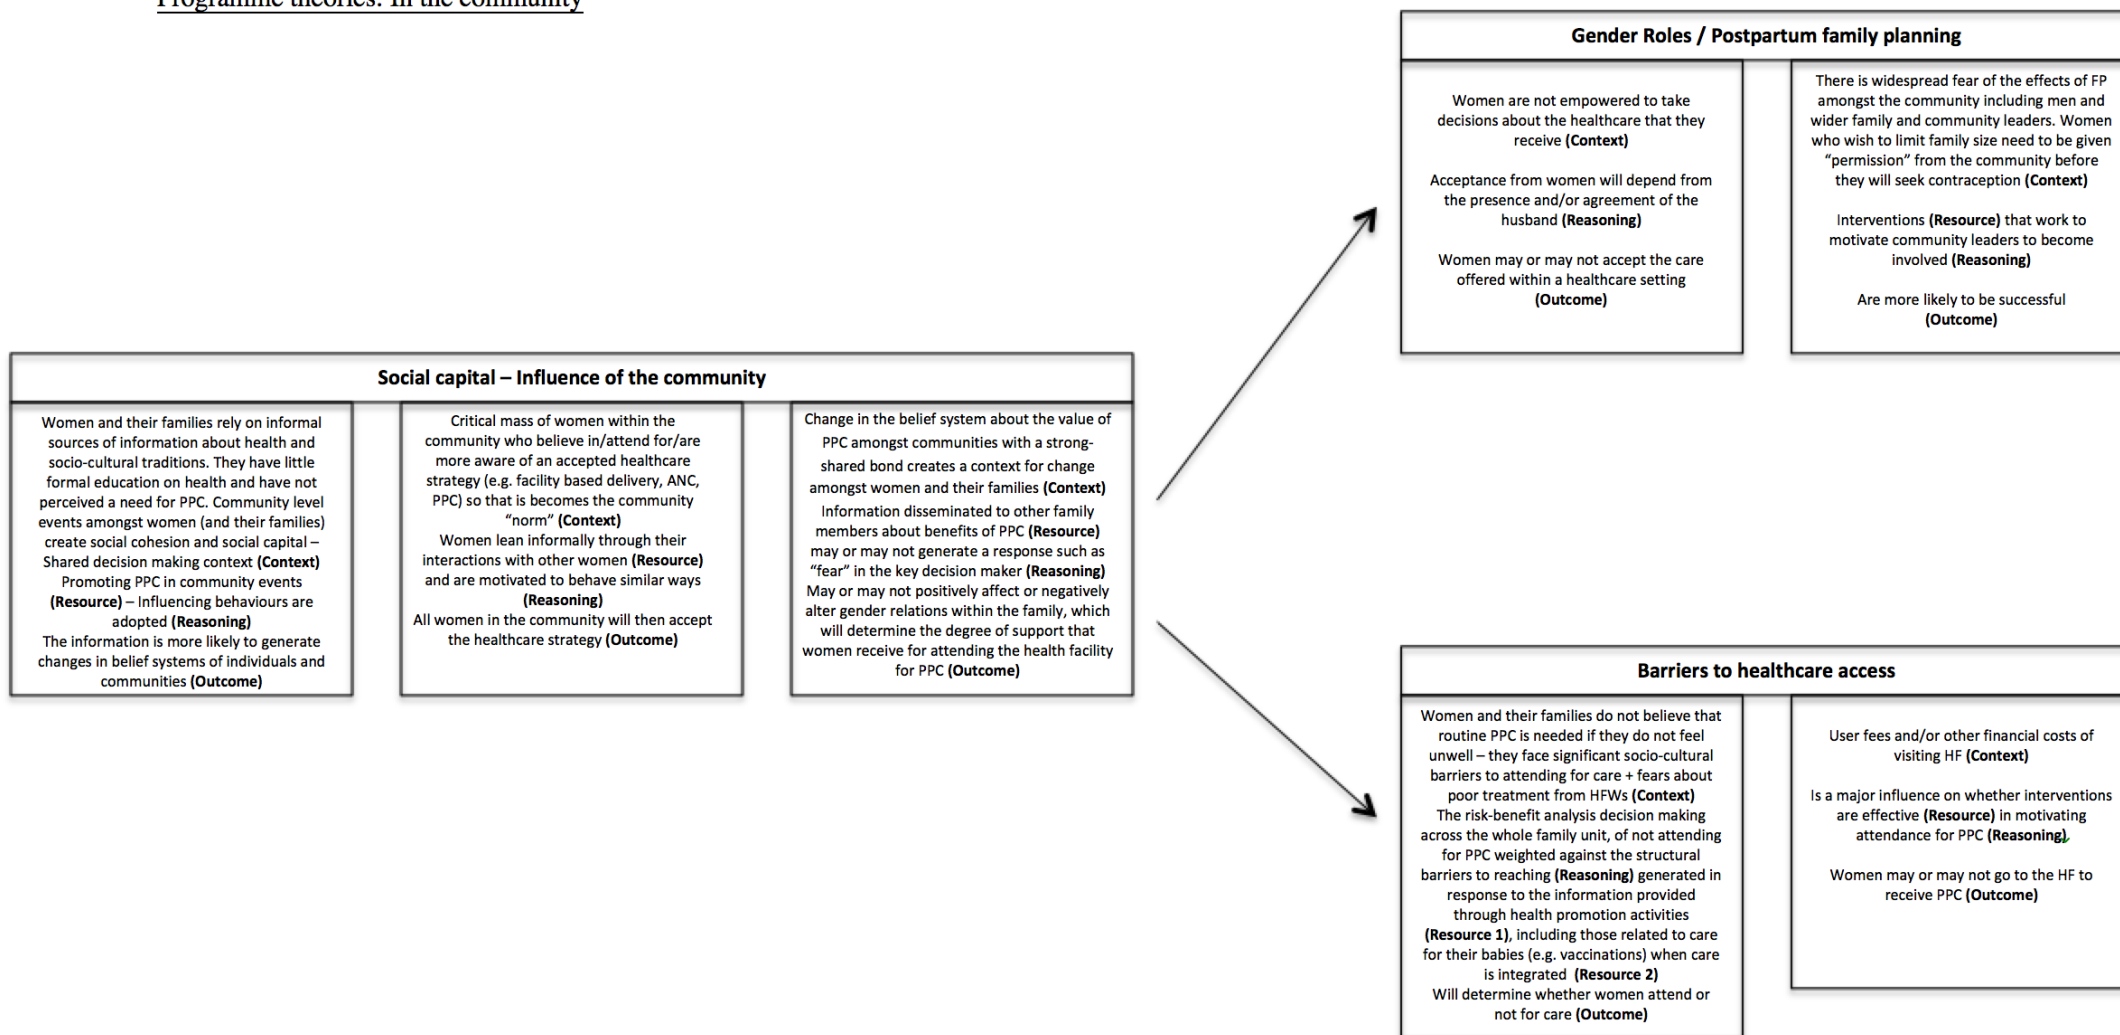

Programme theories: The link between the community and the health facility

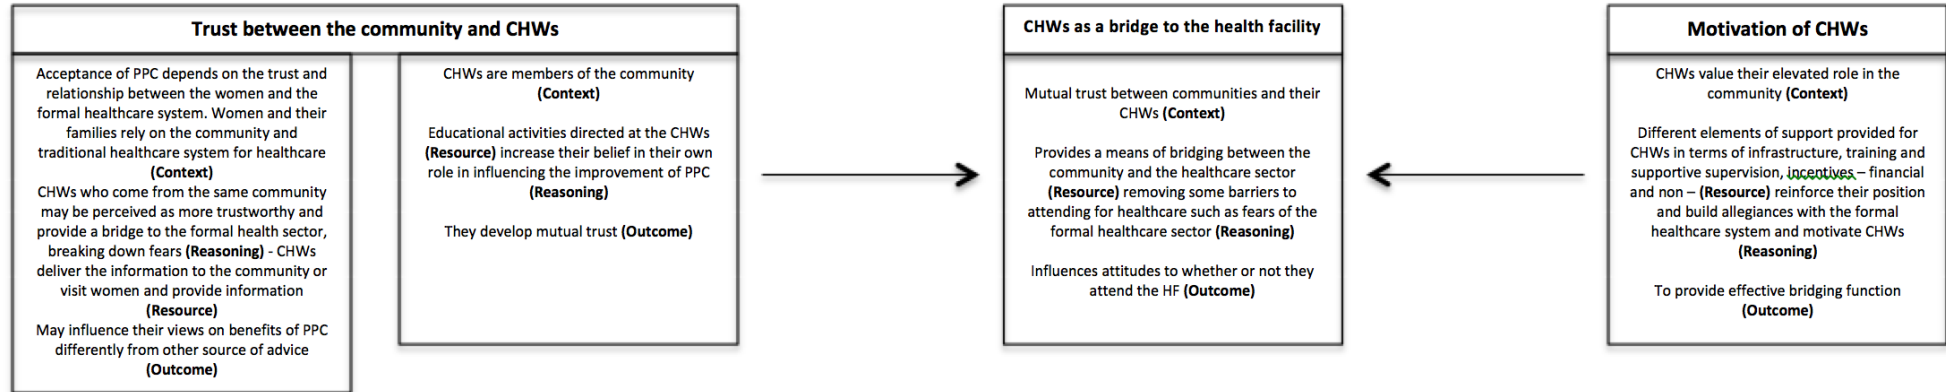

Programme theories: In the health facility

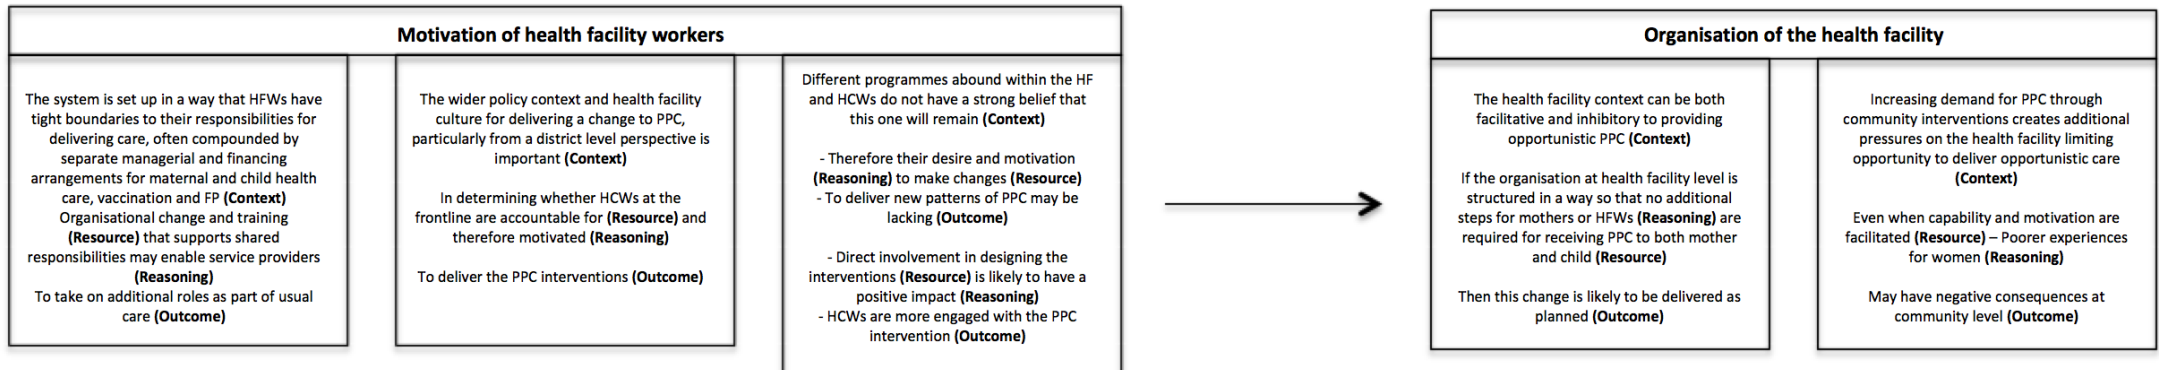

Programme theories: From the health facility towards sustainability

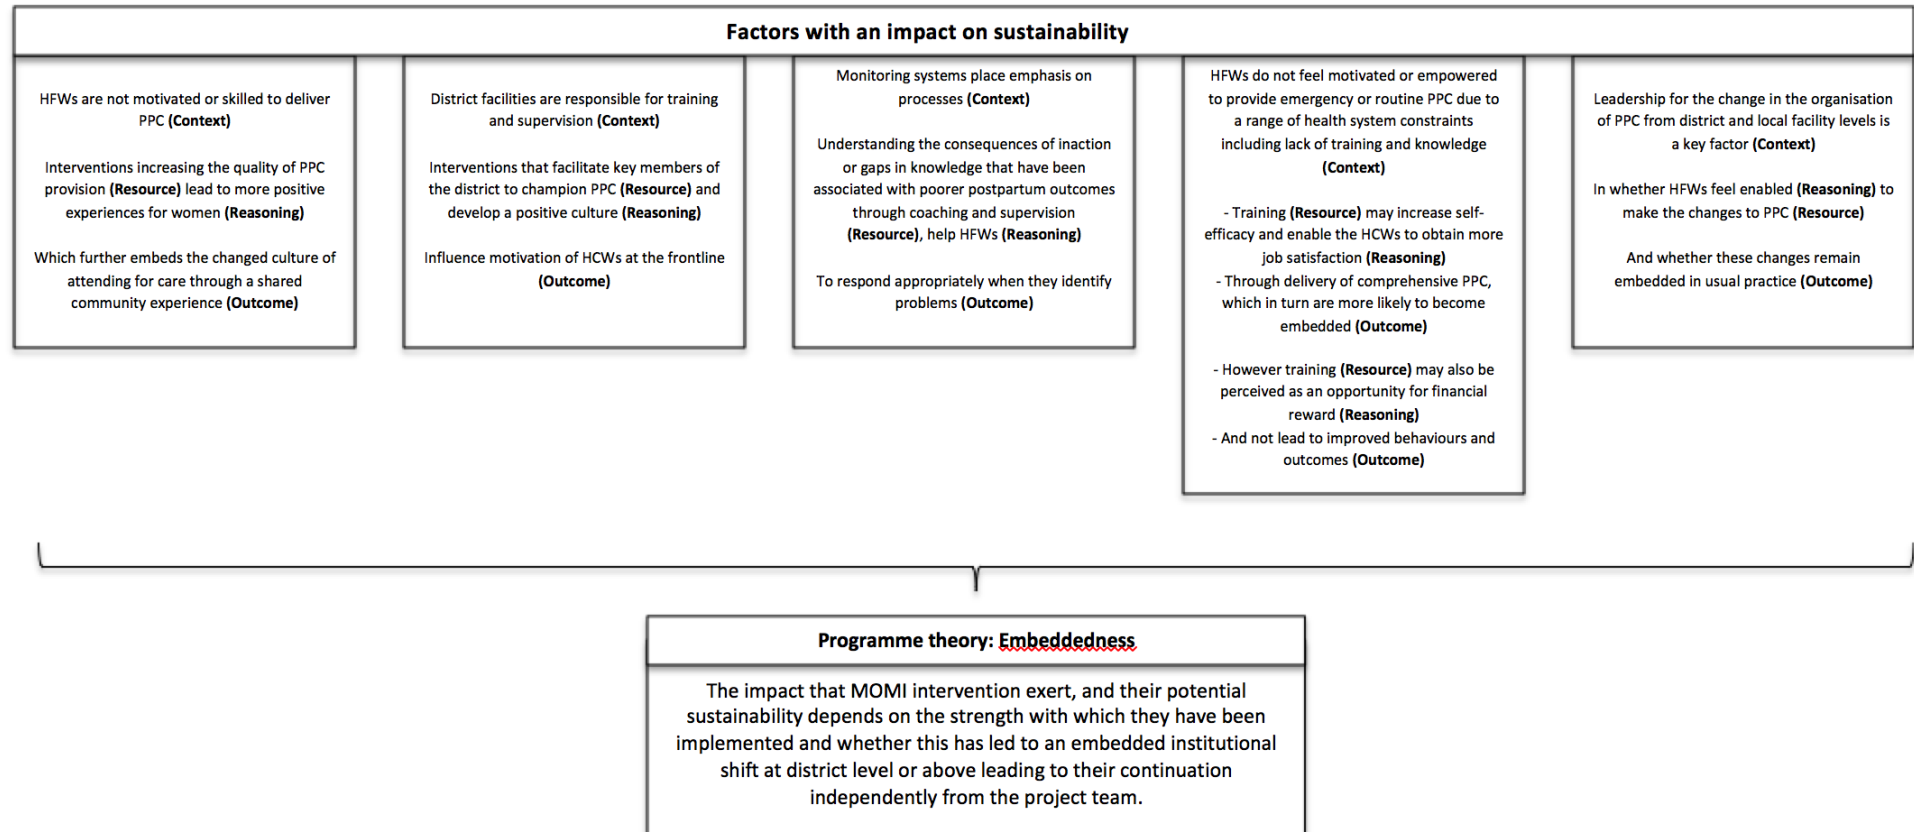

Supplement: bmjgh-2017-000408supp002.pdf [file bmjgh-2017-000408supp002.pdf]
